# Supplementary material for: Inequities in breast cancer treatment in sub-Saharan Africa: findings from a prospective multi-country observational study
Source: Springer Nature journal article supplement (doi:10.1186/s13058-019-1174-4), 2019-08-13

**Additional Figure 1:** Proportion of breast cancer patients whose cancer treatment had not been initiated within 12 months of diagnosis, by setting

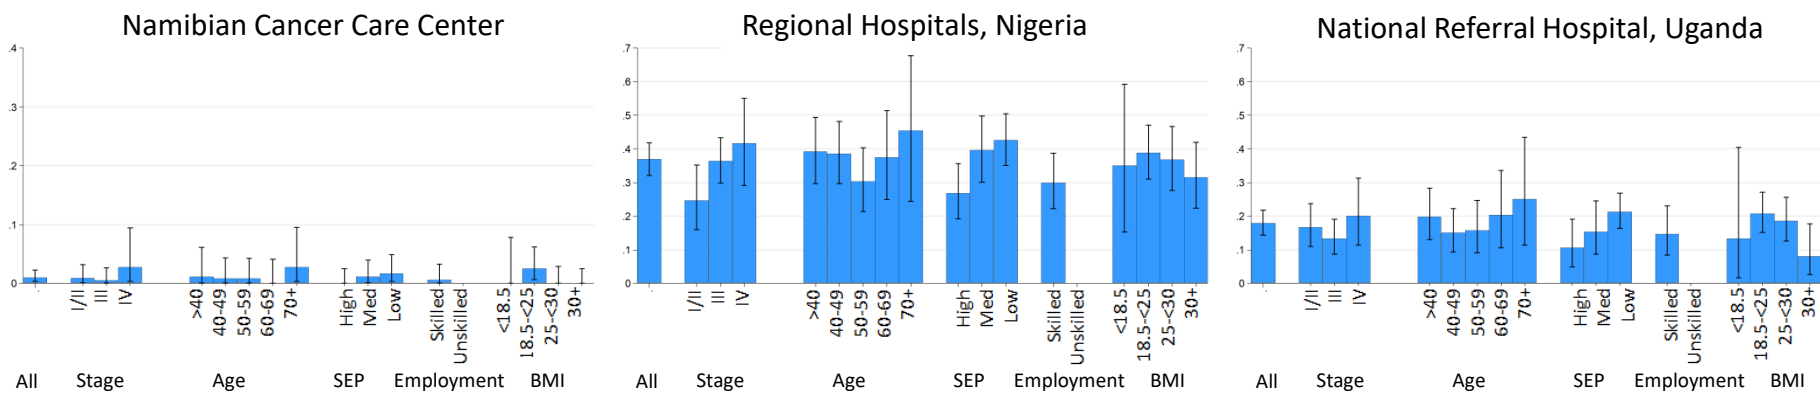

Supplement: MOESM3 [file 17064096]
